# Supplementary material
Source: HighWire-hosted journal article supplement (https://www.jneurosci.org/content/38/15/3840)
Supplement: inline-supplementary-material-5 [file inline-supplementary-material-5.xlsx]

## Sheet: Figure 1-5
Extended data Figure 1-5. Differentially expressed genes identified by the comparison of LIF induced astrocytes and neurospheres
(> 2 fold change, <0.05 FDR, p value <0.001)
High in LIF.NOG
Symbol	Description	Fold Change	p.value	FDR
Fos	FBJ osteosarcoma oncogene	34.543	7.2589e-11	1.5401e-06
Rbp1	retinol binding protein 1, cellular	30.43	8.2335e-08	0.0017469
Apoe	apolipoprotein E	23.053	2.8192e-08	0.00059815
Clu	clusterin	16.02	6.0204e-08	0.0012774
Serpina3n	serine (or cysteine) peptidase inhibitor, clade A, member 3N	13.509	1.4638e-06	0.031058
Cldn11	claudin 11	11.09	1.4184e-07	0.0030094
Aqp4	aquaporin 4	11.017	3.5058e-09	7.4383e-05
Lrp4	low density lipoprotein receptor-related protein 4	8.5392	1.5908e-06	0.033752
Col16a1	procollagen, type XVI, alpha 1	6.7499	3.9119e-07	0.0082998
Kcna6	potassium voltage-gated channel, shaker-related, subfamily, member 6	6.7238	2.3058e-06	0.048922
Nfkbiz	nuclear factor of kappa light polypeptide gene enhancer in B-cells inhibitor, zeta	5.3919	2.9029e-09	6.1591e-05
Plec1	plectin 1	5.3414	2.4116e-07	0.0051167
Dusp1	dual specificity phosphatase 1	5.2348	2.5916e-08	0.00054986
Sulf1	sulfatase 1	5.0911	6.6251e-08	0.0014056
Hspb8	heat shock protein 8	4.3883	8.5639e-07	0.01817
Dbp	D site albumin promoter binding protein	4.2853	3.3811e-08	0.00071737
Klf6	Kruppel-like factor 6	4.25	2.359e-07	0.0050052
Ltbp3	latent transforming growth factor beta binding protein 3	4.077	1.8944e-06	0.040194
Cml1	camello-like 1	3.8983	1.534e-06	0.032547
Cpe	carboxypeptidase E	3.8406	1.7052e-07	0.0036179
Junb	Jun-B oncogene	3.8242	4.0399e-07	0.0085715
Pros1	protein S (alpha)	3.8026	1.5816e-07	0.0033557
Itih3	inter-alpha trypsin inhibitor, heavy chain 3	3.8026	1.2992e-06	0.027565
Stat3	signal transducer and activator of transcription 3	3.728	6.2623e-09	0.00013287
Cd63	Cd63 antigen	3.7115	4.2295e-09	8.9738e-05
9130404D14Rik	RIKEN cDNA 9130404D14 gene	3.3855	1.6685e-09	3.54e-05
Ctsb	cathepsin B	3.3413	2.3556e-08	0.00049979
Srf	serum response factor	3.3158	7.2784e-07	0.015443
Cyr61	cysteine rich protein 61	3.314	4.3778e-07	0.0092883
Lgals3	lectin, galactose binding, soluble 3	3.313	4.5192e-07	0.0095884
Arhgef4	Rho guanine nucleotide exchange factor (GEF) 4	3.2421	9.1459e-07	0.019405
Hist1h2bc	histone cluster 1, H2bc	3.2036	1.3121e-06	0.027839
Ugt1a6b	UDP glucuronosyltransferase 1 family, polypeptide A6B	3.0046	1.7888e-09	3.7953e-05
Paqr8	progestin and adipoQ receptor family member VIII	2.9887	2.7006e-08	0.00057299
Gfra1	glial cell line derived neurotrophic factor family receptor alpha 1	2.9759	1.0005e-09	2.1228e-05
Flot1	flotillin 1	2.905	1.4841e-08	0.00031489
Glud1	glutamate dehydrogenase 1	2.8856	2.9746e-07	0.0063113
Itm2c	integral membrane protein 2C	2.8822	3.6912e-07	0.0078315
Gdf1	growth differentiation factor 1	2.8748	9.6959e-07	0.020572
Igf2bp2	insulin-like growth factor 2 mRNA binding protein 2	2.8746	1.1873e-07	0.0025192
Ugt1a7c	UDP glucuronosyltransferase 1 family, polypeptide A7C	2.7626	3.8591e-10	8.1879e-06
Tmem108	transmembrane protein 108	2.7098	2.082e-06	0.044174
Klf4	Kruppel-like factor 4 (gut)	2.6328	7.1486e-09	0.00015167
2810459M11Rik	RIKEN cDNA 2810459M11 gene	2.6013	5.3312e-07	0.011311
Prnp	prion protein	2.5473	2.7223e-07	0.005776
Hsd3b7	hydroxy-delta-5-steroid dehydrogenase, 3 beta- and steroid delta-isomerase 7	2.5288	7.1886e-09	0.00015252
Cd151	CD151 antigen	2.4861	1.2953e-07	0.0027483
Gabrb3	gamma-aminobutyric acid (GABA-A) receptor, subunit beta 3	2.4852	7.3108e-09	0.00015511
Lynx1	Ly6/neurotoxin 1	2.3736	1.526e-06	0.032378
Col4a5	procollagen, type IV, alpha 5	2.3695	8.2455e-09	0.00017494
Aifm2	apoptosis-inducing factor, mitochondrion-associated 2	2.3213	2.255e-07	0.0047845
Tagln3	transgelin 3	2.1537	7.9422e-08	0.0016851
Anxa5	annexin A5	2.1324	1.7477e-06	0.037082
Ndph	Norrie disease homolog	2.0916	7.1601e-07	0.015192
Bzrap1	benzodiazapine receptor associated protein 1	2.072	6.5856e-07	0.013973
Nr1d1	nuclear receptor subfamily 1, group D, member 1	2.0535	1.2118e-06	0.02571
Eno2	enolase 2, gamma neuronal	2.0255	6.8426e-08	0.0014518
High in Neuro.
Symbol	Description	Fold Change	p.value	FDR
Gng2	guanine nucleotide binding protein (G protein), gamma 2 subunit	2.4069	7.6987e-12	1.6334e-07
Arhgef3	Rho guanine nucleotide exchange factor (GEF) 3	2.2655	1.2969e-09	2.7516e-05
Kcnc4	potassium voltage gated channel, Shaw-related subfamily, member 4	4.0361	1.5918e-08	0.00033773
Skp2	S-phase kinase-associated protein 2 (p45)	3.7582	5.0138e-08	0.0010638
Efs	embryonal Fyn-associated substrate	3.798	1.3959e-07	0.0029617
Arpp21	cyclic AMP-regulated phosphoprotein, 21	2.2241	2.8061e-07	0.0059536
Zfp365	zinc finger protein 365	2.1544	3.3765e-07	0.007164
Nsbp1	nucleosome binding protein 1	2.0864	4.0205e-07	0.0085302
Sfrs7	splicing factor, arginine/serine-rich 7	2.4904	4.7555e-07	0.01009
Tnnt1	troponin T1, skeletal, slow	2.7843	4.9549e-07	0.010513
Tmem158	transmembrane protein 158	7.2373	6.6433e-07	0.014095
Mest	mesoderm specific transcript	2.4607	1.3083e-06	0.027759
2010317E24Rik	RIKEN cDNA 2010317E24 gene	2.6996	1.8322e-06	0.038874
